# Supplementary material for: Phylogenetic relationships of Neogene hamsters (Mammalia, Rodentia, Cricetinae) revealed under Bayesian inference and maximum parsimony
Source: PeerJ. 2024 Nov 15;12:e18440. doi: 10.7717/peerj.18440 (PMC11572387; doi:10.7717/peerj.18440)
Supplement: Supplemental Information 6 [file peerj-12-18440-s006.xlsx]

## Sheet: StratigraphicIndices
Supplemental file S6 for
Phylogenetic relationships of Neogene hamsters (Mammalia, Rodentia, Cricetinae) revealed
under Bayesian inference and maximum parsimony
Moritz Dirnberger1, Pablo Peláez-Campomanes2, Raquel López-Antoñanzas1
1ISEM, Univ Montpellier, CNRS, IRD, Montpellier, France
2Departamento de Paleobiología, Museo Nacional de Ciencias Naturales-CSIC, Madrid, Spain
Stratigraphic congruence indices of reconstructed topologies calculated with the R package strap v1.6 (Bell & Loyd, 2015)
Reconstructed topologies	Stratigraphic indices
	SRL	MIG	GMax	GMin	RCI	GER	MSM*	est.p.RCI	est.p.GER	est.p.MSM*
Bayesian inference non-clock tree	50.055	89.92	1007.46	30.73	-79.6424	0.9394	0.341748	6.74e-07	1.86e-08	7.71e-13
BI Tk02 'fossiltip' clock tree	50.055	52.77	1007.46	30.73	-5.42403	0.977435	0.582338	2.42e-10	1.87e-16	1.61e-38
BI IGR 'fossiltip' clock tree	50.055	48.465	1007.46	30.73	3.17651	0.981842	0.634066	5.47e-12	2.5e-20	6.88e-53
Maximum parsimony equal weights tree	50.055	66.215	1007.46	30.73	-32.2845	0.963669	0.464094	8.58e-08	1.09e-10	1.59e-19
MP implied weights tree	50.055	63.125	1007.46	30.73	-26.1113	0.966833	0.486812	0.000231542	2.39e-06	1.04e-21
Reference
Bell MA, Lloyd GT. 2015. strap: an R package for plotting phylogenies against stratigraphy and assessing their stratigraphic congruence.
Palaeontology 58:379–389.
