# Supplementary material for: Phylogenetic relationships of Neogene hamsters (Mammalia, Rodentia, Cricetinae) revealed under Bayesian inference and maximum parsimony
Source: PeerJ. 2024 Nov 15;12:e18440. doi: 10.7717/peerj.18440 (PMC11572387; doi:10.7717/peerj.18440)
Supplement: Supplemental Information 7 [file peerj-12-18440-s007.xlsx]

## Sheet: Tabelle1
Supplemental file S7 for
Phylogenetic relationships of Neogene hamsters (Mammalia, Rodentia,
Cricetinae) revealed under Bayesian inference and maximum parsimony
Moritz Dirnberger1, Pablo Peláez-Campomanes2, Raquel López-Antoñanzas1
1ISEM, Univ Montpellier, CNRS, IRD, Montpellier, France
2Departamento de Paleobiología, Museo Nacional de Ciencias Naturales-CSIC, Madrid, Spain
Synapomorphies and autapomorphies of the maximum parsimony implied
weighting majority consenus tree in TNT v.1.6 (Goloboff & Morales, 2023)
Maximum parsimony implied weighting majority consenus tree with nodenumbers
Taxa/Nodes	Autapomorphies/Synapomorphies
Eucricetodon wangae	No autapomorphies
Apocricetus plinii	58: 0 → 1
Apocricetus alberti	No autapomorphies
Apocricetus angustidens	No autapomorphies
Apocricetus barrierei	113: 0 → 1
Pseudocricetus orienteuropaeus	37: 1 → 4
	39: 1 → 0
	58: 0 → 1
Pseudocricetus kormosi	56: 2 → 4
Hattomys beetsi	24: 4 → 1
	25: 0 → 1
	37: 4 → 2
	83: 0 → 1
Hattomys nazarii	32: 0 → 1
Hattomys gargantua	29: 0 → 1
Neocricetodon fahlbuschi	35: 0 → 1
	39: 1 → 0
Neocricetodon moldavicus	41: 1 → 02
	75: 0 → 1
Neocricetodon nestori	71: 0 → 2
	79: 0 → 1
	92: 0 → 1
	113: 0 → 1
Neocricetodon browni	No autapomorphies
Neocricetodon progressus	37: 1 → 2
Neocricetodon occidentalis	55: 0 → 1
	75: 0 → 1
	102: 2 → 1
Neocricetodon hanae	No autapomorphies
Neocricetodon grangeri	0: 1 → 0
	80: 0 → 1
Neocricetodon intermedius	48: 1 → 2
	52: 1 → 0
	75: 0 → 1
	78: 0 → 1
	102: 2 → 1
	111: 0 → 1
Neocricetodon polonicus	0: 1 → 0
	32: 0 → 1
Neocricetodon magnus	69: 1 → 0
	99: 1 → 0
	110: 1 → 0
Neocricetodon similis	No autapomorphies
Neocricetodon skofleki	12: 0 → 1
	62: 0 → 1
Collimys transversus	0: 1 → 0
	99: 0 → 1
Collimys gudrunae	19: 1 → 0
	39: 1 → 0
Coll imys hiri	39: 1 → 0
	47: 0 → 1
	80: 0 → 2
	83: 0 → 1
Collimys longidens	52: 0 → 1
	99: 0 → 1
Collimys dobosi	No autapomorphies
Cricetulodon complicidens	0: 1 → 0
	38: 1 → 0
Cricetulodon hartenbergeri	52: 0 → 1
Cricetulodon sabadellensis	No autapomorphies
Cricetulodon bugesiensis	No autapomorphies
Cricetulodon lucentensis	11: 1 → 2
	29: 0 → 3
	40: 0 → 1
	53: 1 → 0
	54: 1 → 0
	58: 0 → 1
Cricetulodon meini	65: 0 → 1
Rotundomys freiriensis	48: 1 → 2
	60: 2 → 0
	70: 1 → 0
	93: 1 → 0
Rotundomys intimus	No autapomorphies
Rotundomys sabatieri	No autapomorphies
Rotundomys montisrotundi	32: 1 → 0
Rotundomys bressanus	59: 0 → 1
Node 45	12: 0 → 1
	25: 1 → 0
	72: 0 → 2
Node 46	27: 0 → 1
Node 47	70: 0 → 1
	72: 1 → 0
	73: 1 → 0
	102: 0 → 1
Node 48	37: 2 → 1
Node 49	6: 0 → 1
Node 50	No synapomorphies
Node 51	56: 2 → 4
Node 52	51: 0 → 3
Node 53	111: 0 → 1
Node 54	0: 1 → 2
	6: 1 → 0
Node 55	12: 0 → 1
	55: 0 → 1
Node 56	0: 1 → 3
	19: 1 → 0
	39: 1 → 0
	60: 2 → 0
	63: 0 → 1
	65: 0 → 1
	72: 2 → 1
	108: 2 → 5
Node 57	14: 0 → 1
	35: 0 → 1
	36: 1 → 0
	47: 0 → 1
	48: 1 → 0
	115: 0 → 1
Node 58	114: 0 → 1
Node 59	52: 0 → 1
Node 60	19: 1 → 0
	52: 0 → 1
	55: 0 → 1
	99: 0 → 1
Node 61	36: 1 → 0
Node 62	69: 0 → 1
	70: 1 → 0
	102: 1 → 2
Node 63	24: 1 → 3
	110: 0 → 1
Node 64	92: 0 → 1
Node 65	27: 0 → 1
Node 66	24: 3 → 4
	25: 1 → 0
	37: 1 → 0
	60: 2 → 0
	70: 0 → 1
	92: 1 → 0
Node 67	56: 2 → 4
	114: 1 → 0
Node 68	19: 1 → 0
	36: 1 → 0
Node 69	55: 0 → 1
Node 70	41: 1 → 0
	48: 1 → 0
	63: 0 → 1
	65: 0 → 2
	67: 0 → 1
	72: 2 → 0
	102: 0 → 2
	114: 0 → 1
Node 71	4: 2 → 6
	10: 1 → 0
	33: 1 → 2
	46: 0 → 3
	75: 0 → 1
Node 72	70: 0 → 1
	72: 1 → 2
Node 73	29: 0 → 1
	36: 1 → 0
Node 74	32: 0 → 1
	51: 4 → 1
Node 75	41: 0 → 2
Node 76	41: 01 → 2
	45: 0 → 1
	70: 1 → 0
Node 77	19: 1 → 2
	25: 1 → 3
	36: 1 → 2
	56: 2 → 4
	87: 0 → 1
Node 78	29: 0 → 1
Node 79	32: 0 → 1
	109: 0 → 1
Reference
Goloboff PA, Morales ME. 2023. TNT version 1.6, with a graphical interface for MacOS
and Linux, including new routines in parallel. Cladistics: The International Journal of the
Willi Hennig Society 39: 144–153.
